# Supplementary material for: Mebendazole Treatment Disrupts the Transcriptional Activity of Hypoxia-Inducible Factors 1 and 2 in Breast Cancer Cells
Source: MDPI journal article supplement (doi:10.3390/cancers15041330), 2023-02-20

Figure 3H: SUM159 uncropped

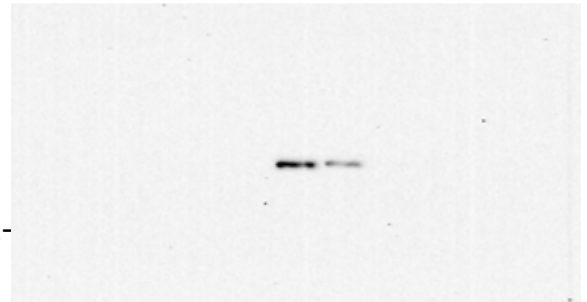

NDRG1-

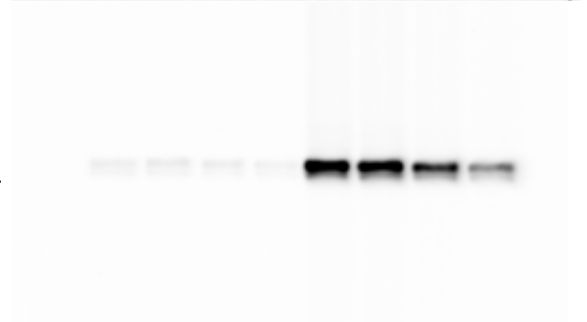

CA9 -

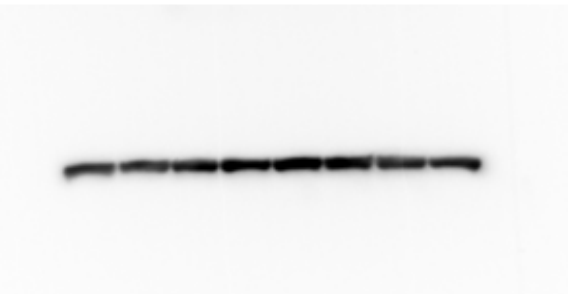

Actin -

Figure 3D: MDA-MB-231 uncropped

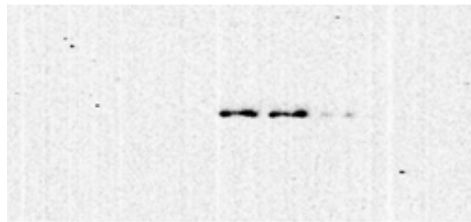

NDRG1-

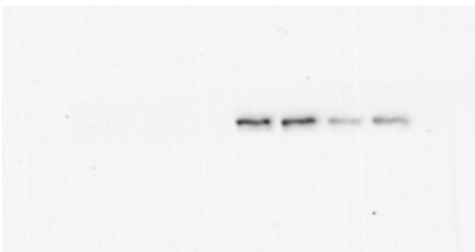

CA9 -

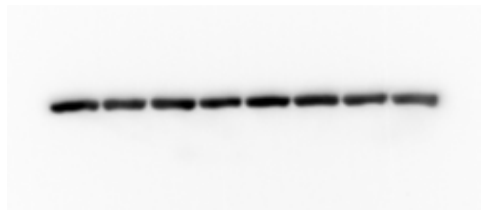

Actin -

Supplemental 3D and 4C: MCF7 uncropped

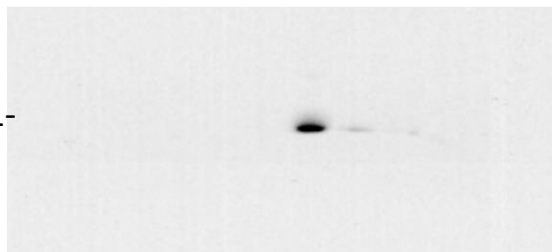

NDRG1-

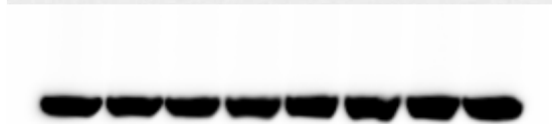

Actin-

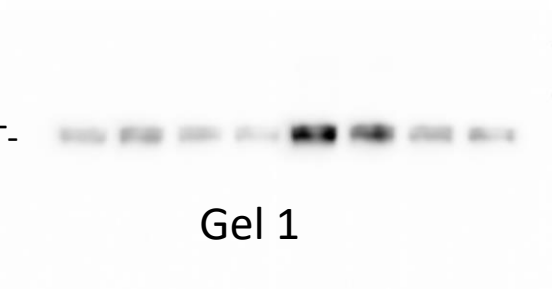

ARNT-

Gel 1

CA9-

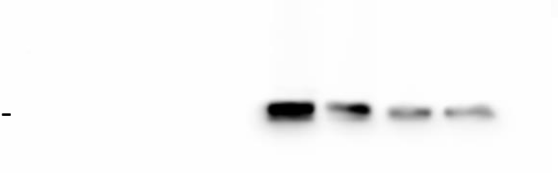

HIF1-

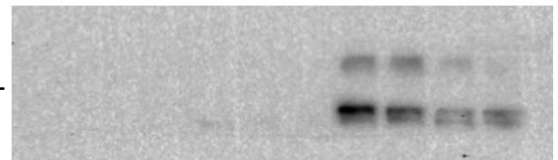

HIF2-

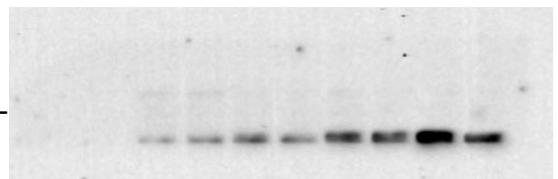

actin-

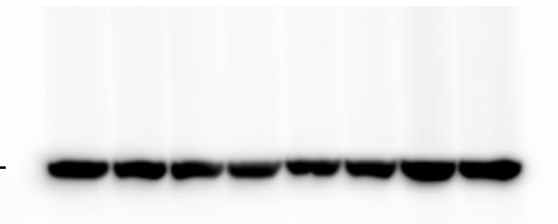

Figure 4A: MDA-MB-231 uncropped

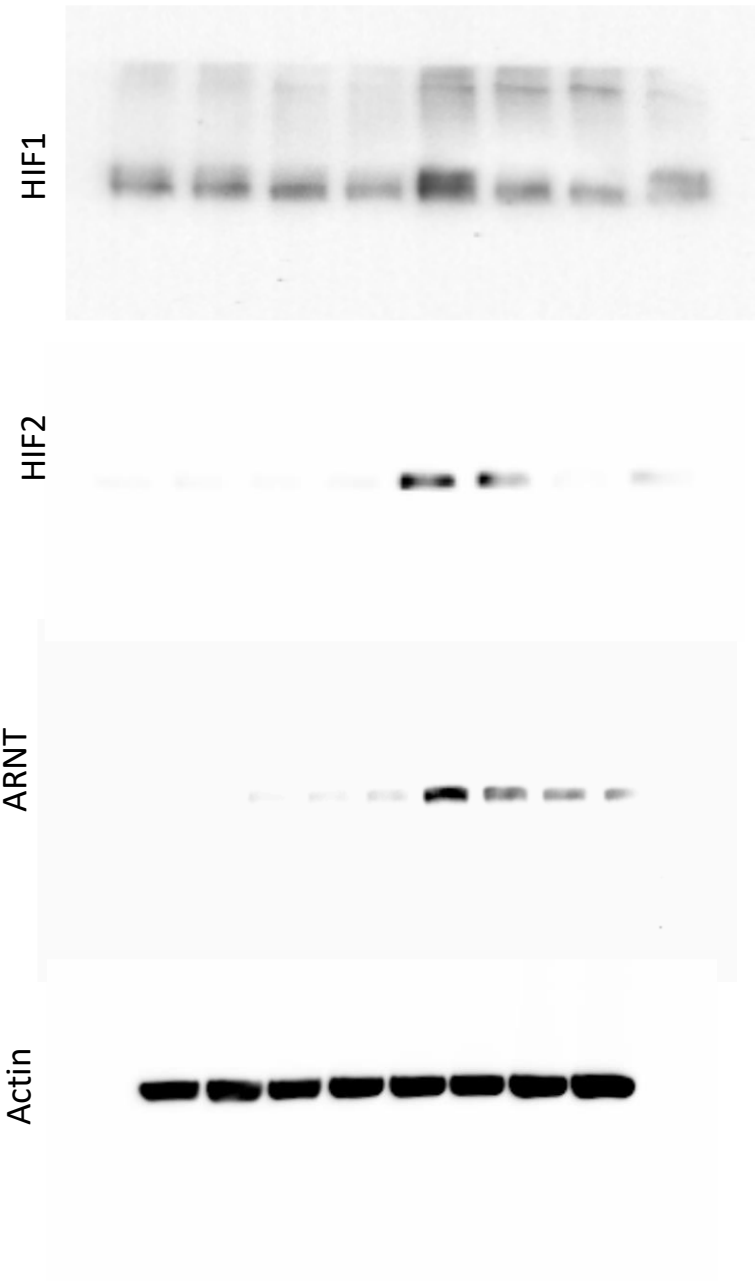

Figure 4B: SUM159 uncropped

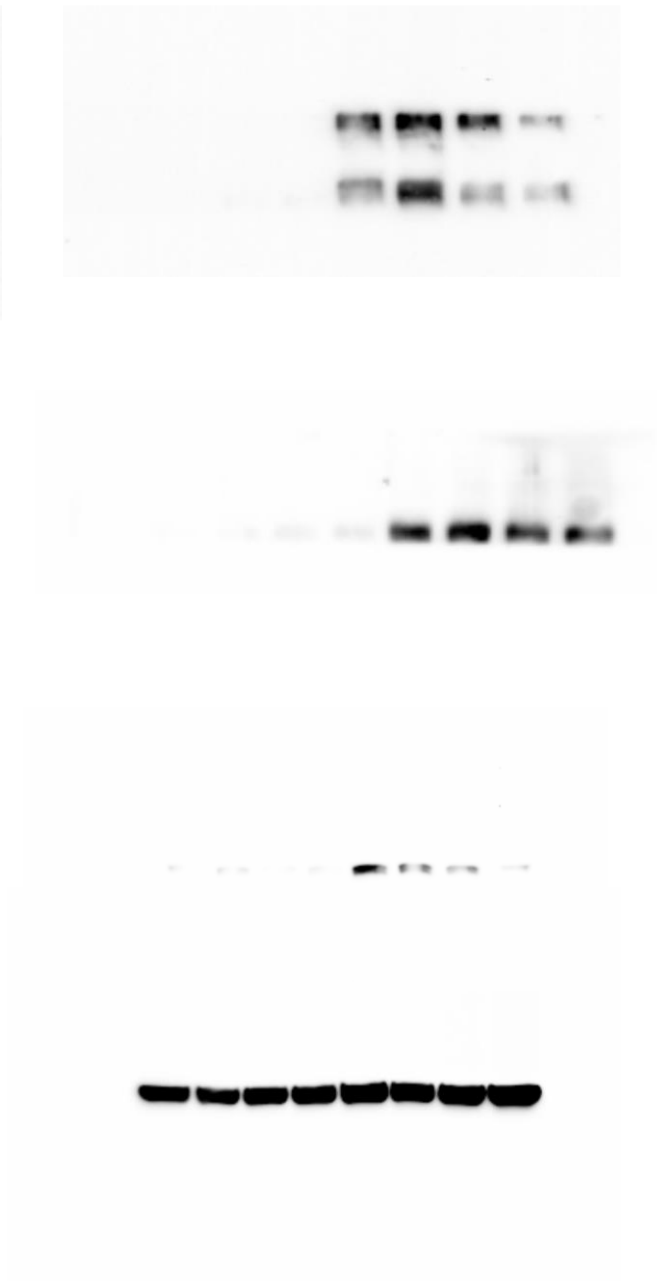

Supplement: s1 [file s1]
