# Supplementary material for: Mebendazole Treatment Disrupts the Transcriptional Activity of Hypoxia-Inducible Factors 1 and 2 in Breast Cancer Cells
Source: MDPI journal article supplement (doi:10.3390/cancers15041330), 2023-02-20
Supplement: s1 [file s1]

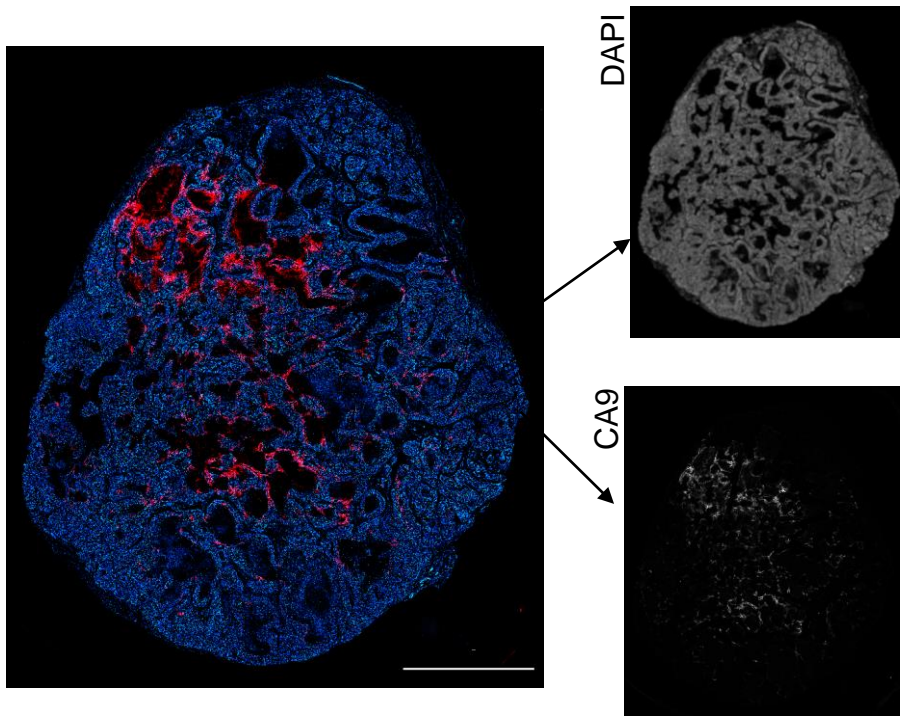

CA9 and DAPI were thresholded manually  
to identify % positive areas using IMAGEJ  

$$\%CA9 = \frac{\text{CA9 Threshold area}}{\text{DAPI Threshold area}}$$

Mouse ID:

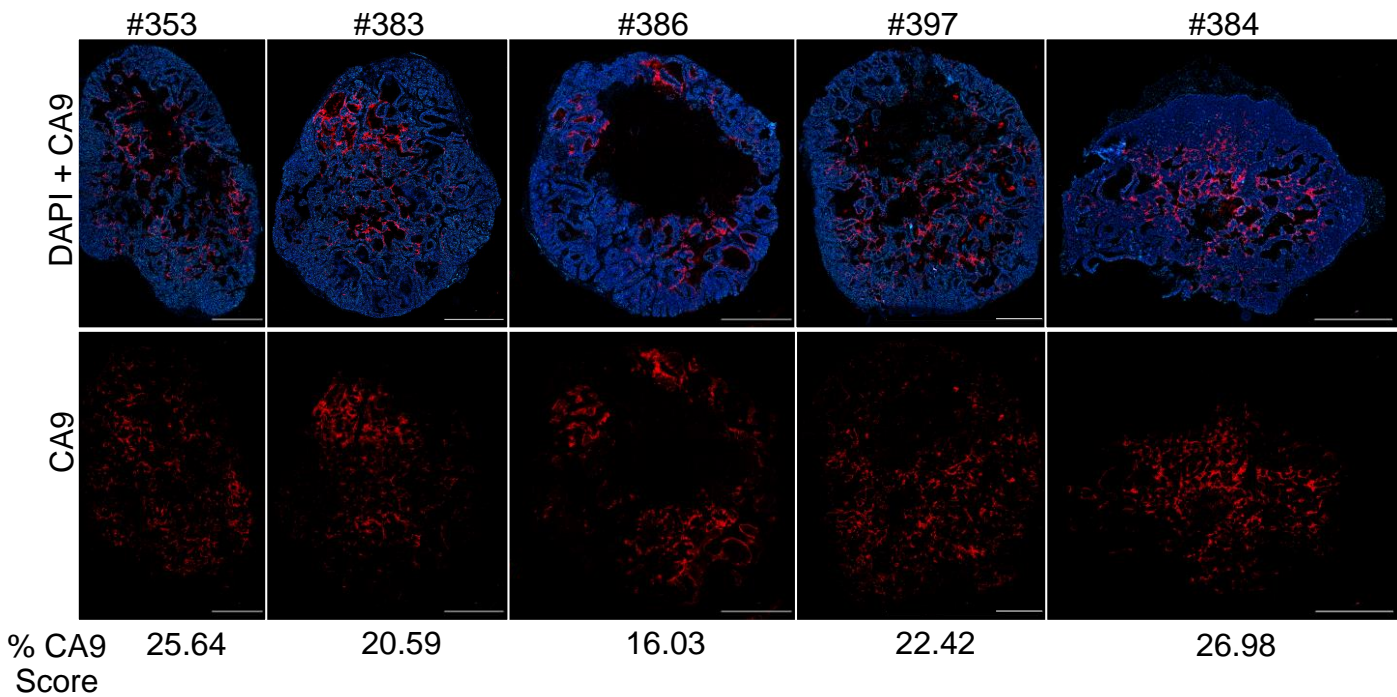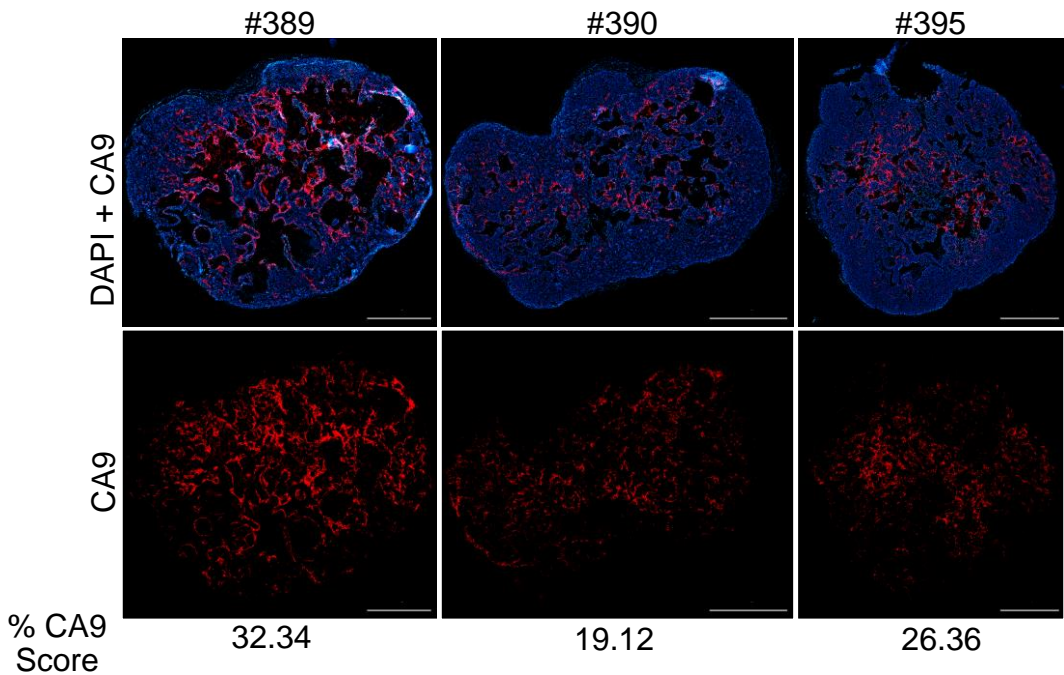

N=8  
Vehicle treated mice  
Scale bar = 3mm

Mouse ID:

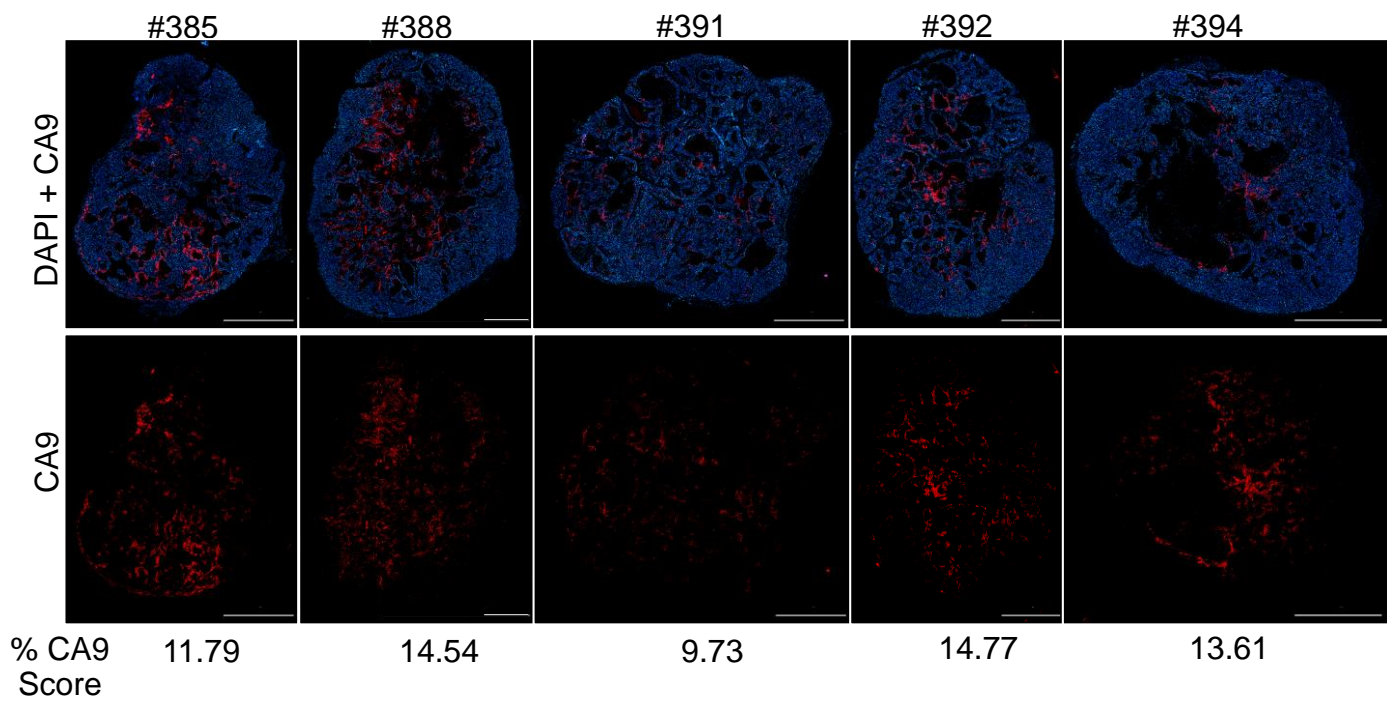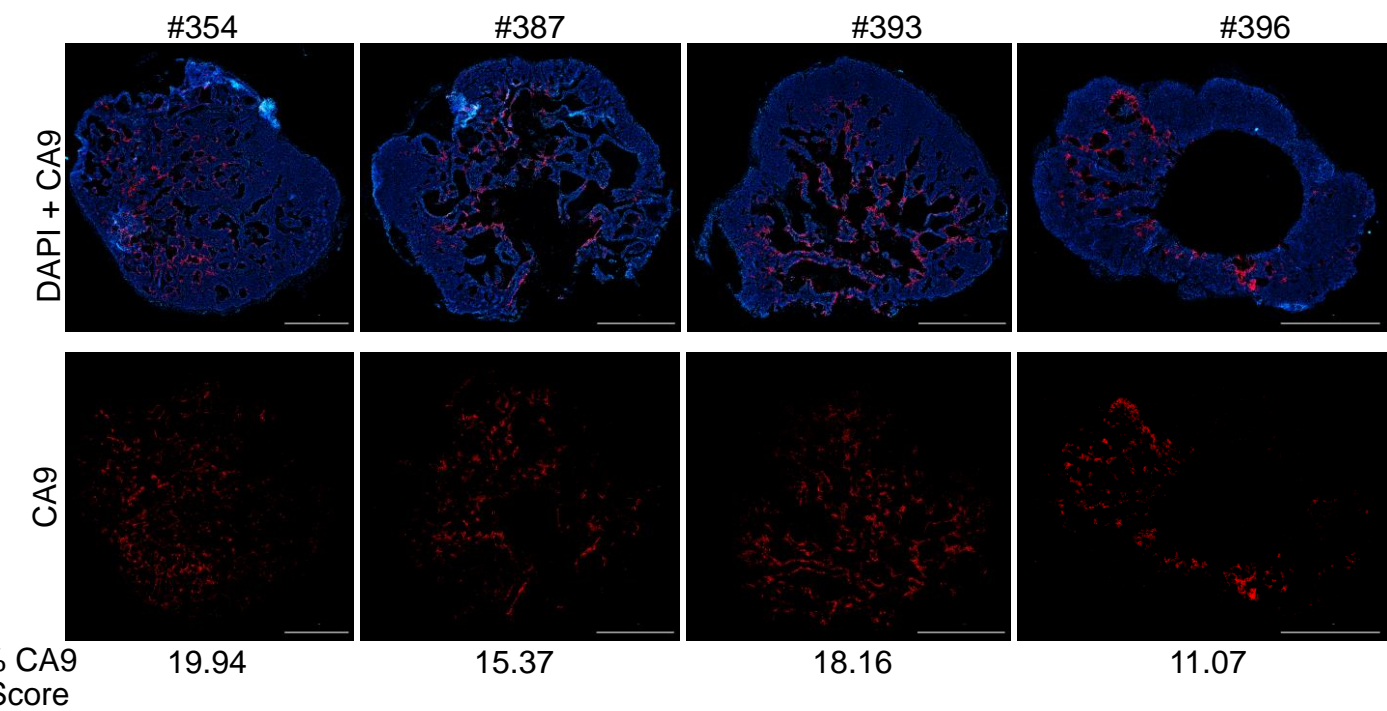

N=9  
MBZ treated mice (30mg/kg)  
scale bar = 3mm
